# Supplementary material
Source: PubMed Central journal article supplement (PMC3242666)

# Figure S2

Figure S2a

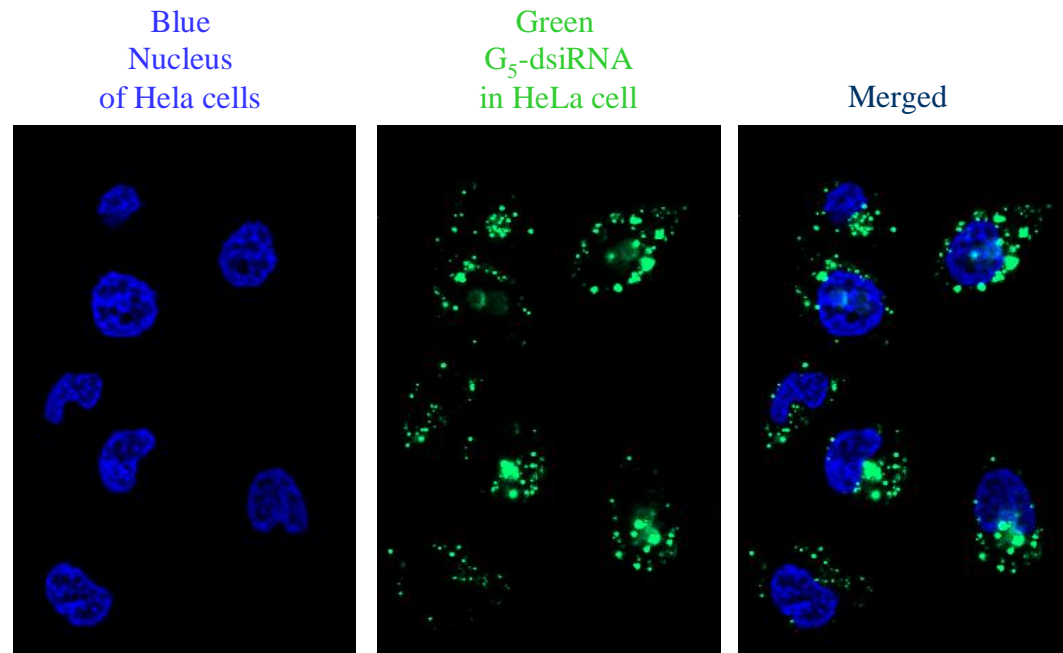

Figure S2b

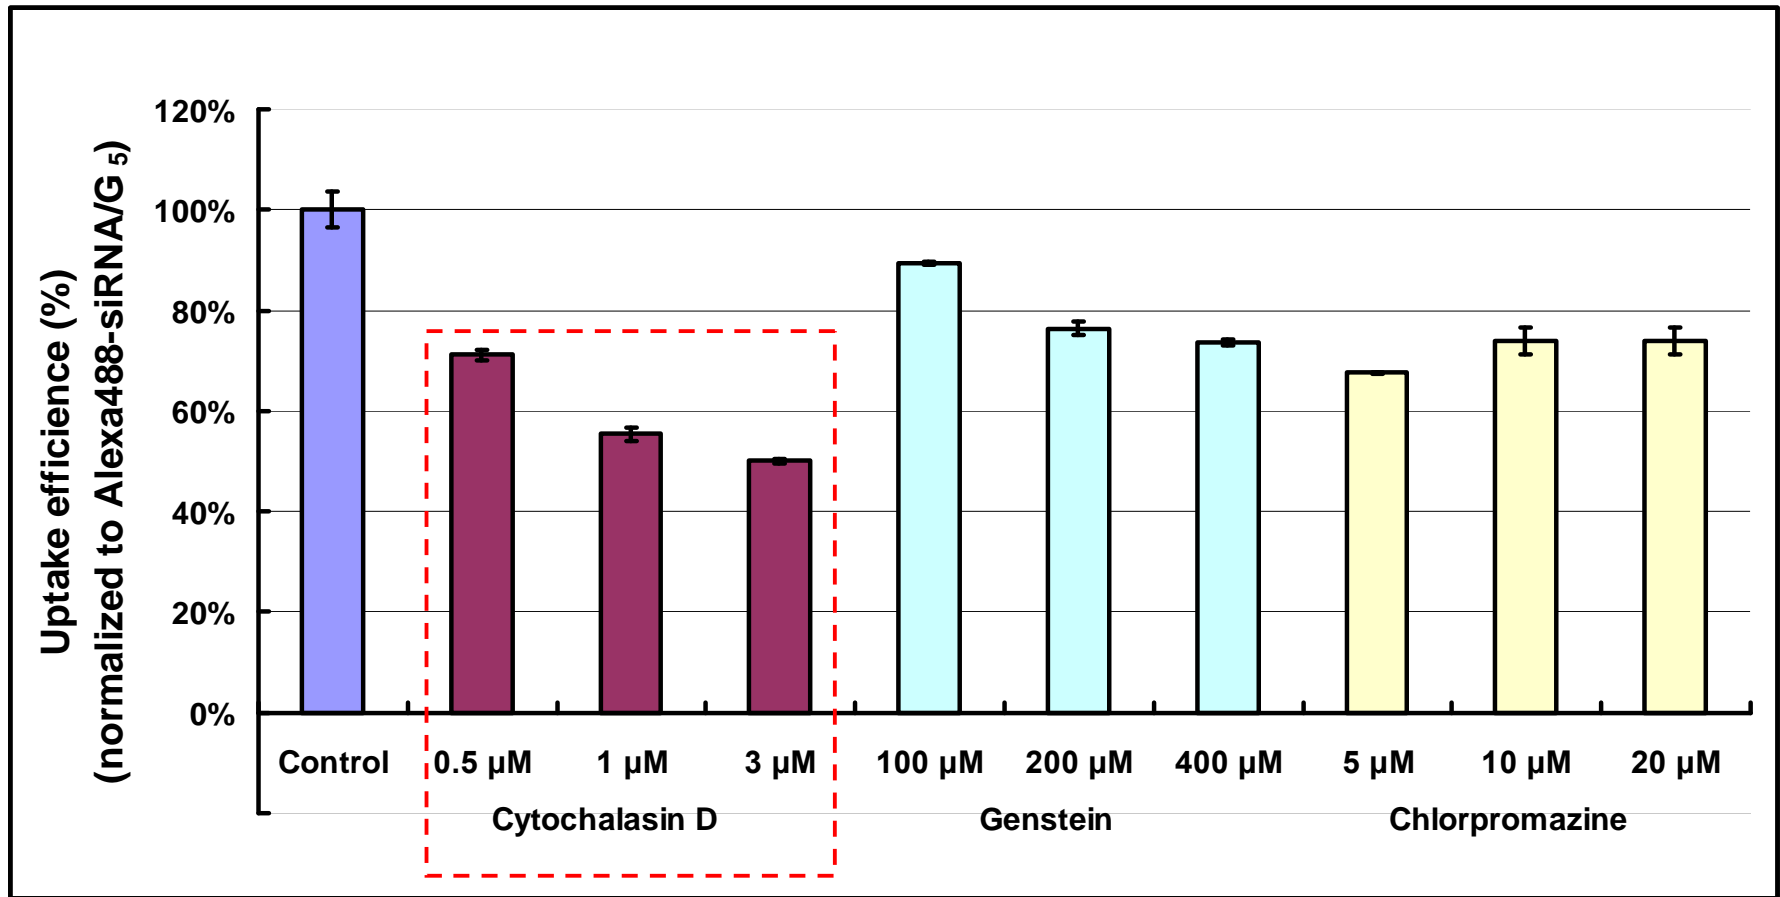

[Macropinocytosis is the dominative cell uptake pathway!](#)

Figure S2 c

Uptake of G<sub>5</sub>-dsiRNA complex depolymerizes actin

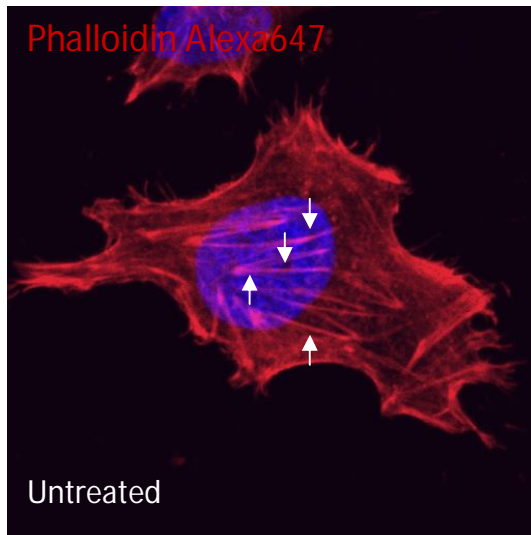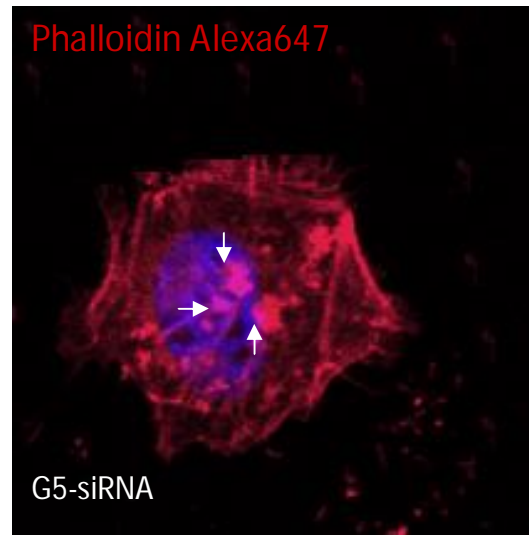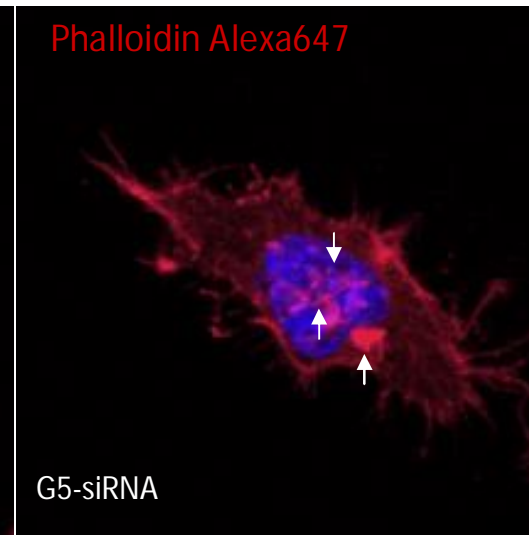

Supplement: mt2011207x2.pdf [file mt2011207x2.pdf]
