# Supplementary material
Source: PubMed Central journal article supplement (PMC3242666)

Figure S3

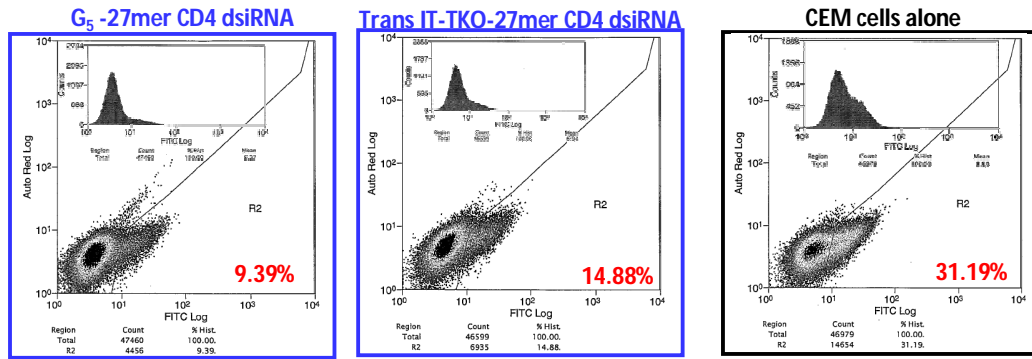

Figure S3a

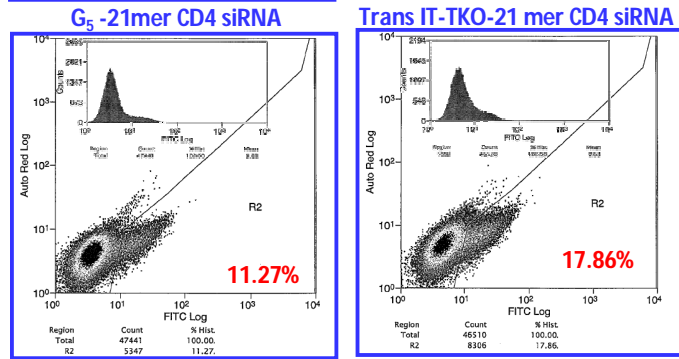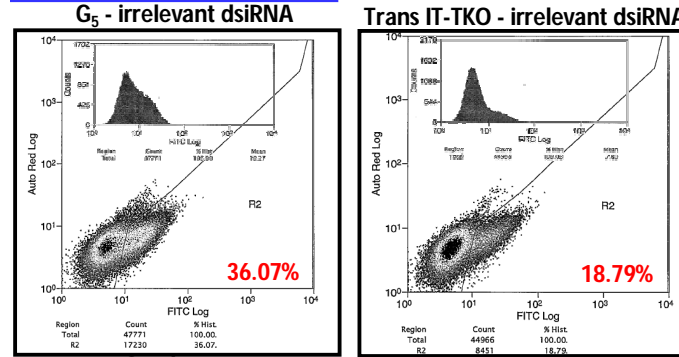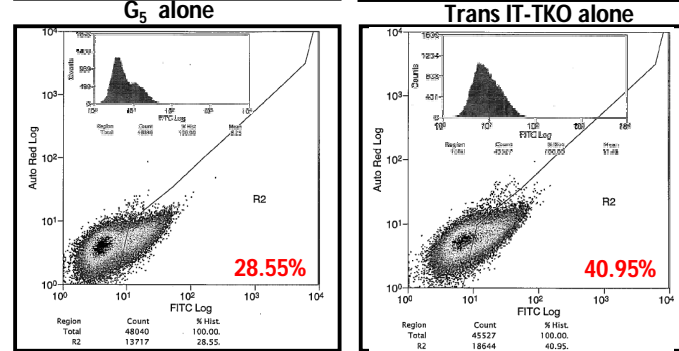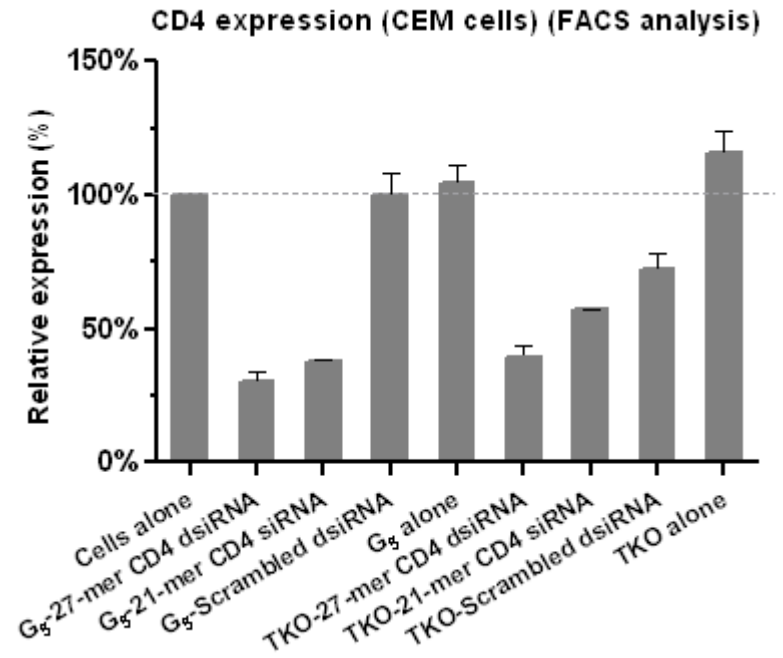

Figure S3b

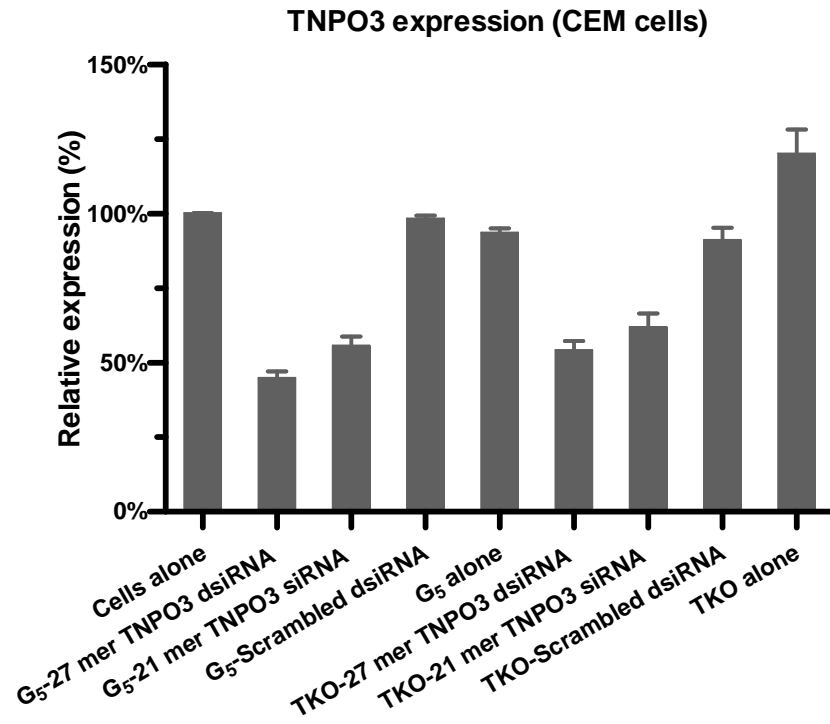

Figure S3c

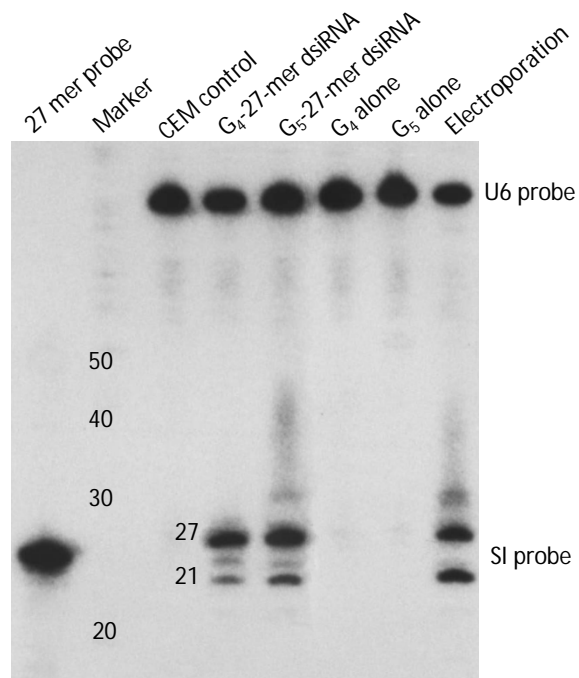

Figure S3d

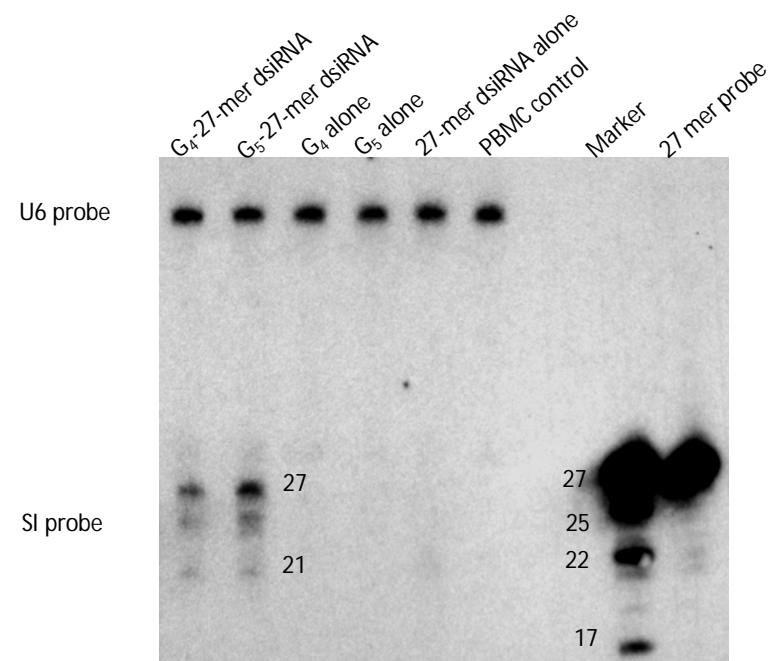

Figure S3e

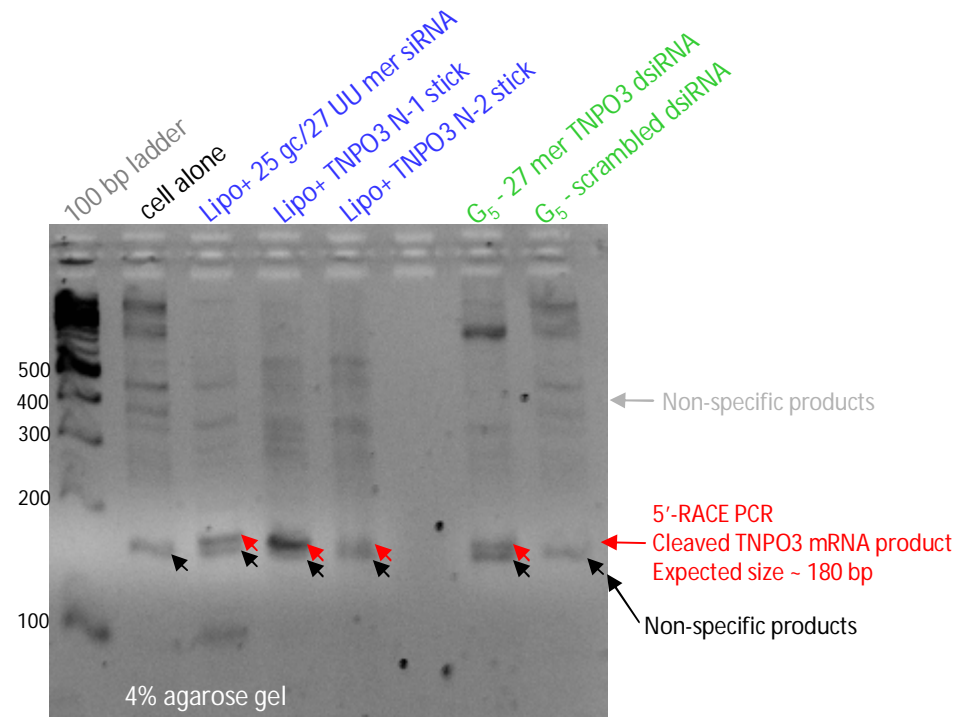

Figure S3f: TNPO3 mRNA cleavage site

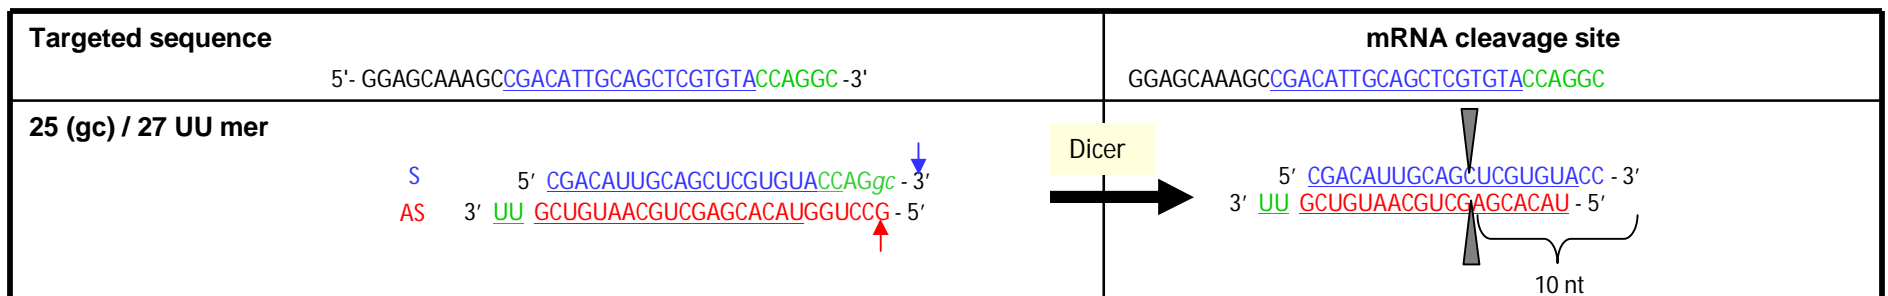

Figure 3 g

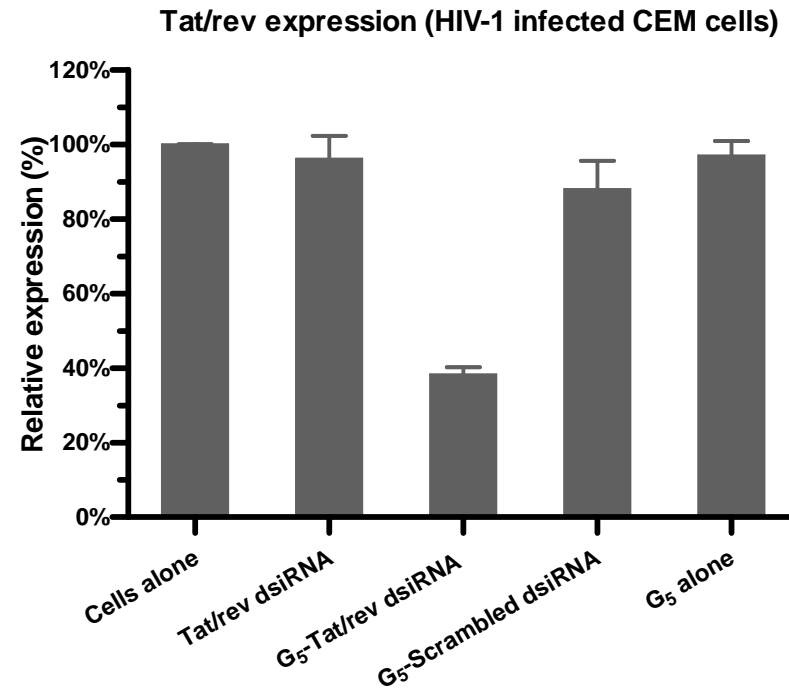

Supplement: mt2011207x3.pdf [file mt2011207x3.pdf]
