# Supplementary material
Source: PubMed Central journal article supplement (PMC3242666)
Supplement: mt2011207x8.pdf [file mt2011207x8.pdf]

Table S1

a: uninfected control

| Treatment | Weeks Post Infection | Uninfected Control |      |
|-----------|----------------------|--------------------|------|
|           |                      | J410               | J411 |
| -4        | 4                    | 0                  | 0    |
| -3        | 5                    | 0                  | 0    |
| 1         | 8                    | 0                  | 0    |
| 2         | 9                    | 0                  | 0    |
| 3         | 10                   | 0                  | 0    |
| 4         | 11                   | 0                  | 0    |
| 5         | 12                   | 0                  | 0    |
| +1        | 13                   | 0                  | 0    |
| +2        | 14                   | 0                  | 0    |
| +3        | 15                   | 0                  | 0    |
| +4        | 16                   | 0                  | 0    |

Table S1b

|           |                      | Non-treated |        |         |        |        |        |        |
|-----------|----------------------|-------------|--------|---------|--------|--------|--------|--------|
| Treatment | Weeks Post Infection | J377        | J378   | J379    | J380   | J381   | J389   | J390   |
| -4        | 4                    | 47100       | 195000 | 313000  | 24000  | 99100  | 41100  | 27400  |
| -3        | 5                    | 211000      | 42200  | 143000  | 486000 | 291000 | 143000 | 211000 |
| 1         | 8                    | 115000      | 289000 | 188000  | 139000 | 23500  | 177000 | 139000 |
| 2         | 9                    | 81200       | 245000 | 70800   | 50100  | 107000 | 66100  | 50100  |
| 3         | 10                   | 70800       | 151000 | 17800   | 115000 | 50100  | 87000  | 66100  |
| 4         | 11                   | 555000      | 166000 | 1610000 | 16000  | 0      |        | 2910   |
| 5         | 12                   | 66100       | 76200  |         | 40200  | 254000 | 555000 | 19800  |
| +1        | 13                   | 36800       | 26000  | 23200   | 1650   | 987    | 58200  | 13100  |
| +2        | 14                   | 27600       | 51900  | 8750    | 41200  | 20700  | 32800  | 26000  |
| +3        | 15                   | 66400       | 154000 | 61900   | 190000 | 28700  | 134000 | 66400  |
| +4        | 16                   | 4010        | 8010   | 4680    | 109000 | 17300  | 40300  | 18700  |

Table S1c

| Naked siRNA (cocktail) |                      |        |        |        |        |        |
|------------------------|----------------------|--------|--------|--------|--------|--------|
| Treatment              | Weeks Post Infection | J431   | J432   | J433   | J434   | J435   |
| -4                     | 4                    | 16000  | 25600  | 18300  | 5790   | 130000 |
| -3                     | 5                    | 75200  | 211000 | 486000 | 163000 | 37100  |
| 1                      | 8                    |        | 12300  | 7520   | 7990   | 27200  |
| 2                      | 9                    | 35500  | 4500   | 35500  | 27000  | 7800   |
| 3                      | 10                   | 107000 | 40800  | 43700  | 14500  | 6350   |
| 4                      | 11                   | 35500  | 4500   | 35500  | 27000  | 7800   |
| 5                      | 12                   | 4790   | 2190   | 21200  | 3610   | 19800  |
| +1                     | 13                   | 9810   | 3110   | 13100  | 932    | 2080   |
| +2                     | 14                   | 38900  | 17400  | 18500  | 7360   | 3700   |
| +3                     | 15                   | 134000 | 143000 | 35400  | 76400  | 37900  |
| +4                     | 16                   | 218000 | 12700  | 4330   | 37300  | 504    |

Table S1d

| G5 (mutant) |                      |          |          |          |
|-------------|----------------------|----------|----------|----------|
| Treatment   | Weeks Post Infection | J461     | J462     | J465     |
| -4          | 4                    | 129816.4 | 80874.16 | 312614.3 |
| -3          | 5                    | 42162.87 | 70553.52 | 51141.78 |
| 1           | 8                    | 1127.457 | 1060.519 | 3607.036 |
| 2           | 9                    | 2591.553 | 1836.323 | 11013.53 |
| 3           | 10                   | 13542.32 | 2591.553 | 6799.406 |
| 4           | 11                   | 254344.3 | 639609.6 | 849461.3 |
| 5           | 12                   | 236927.2 | 76155.38 | 337793   |
| +1          | 13                   | 2774.18  | 1106.96  | 3915.26  |
| +2          | 14                   | 6952.438 | 1752.401 | 12345.64 |
| +3          | 15                   | 133664.4 | 57727.79 | 153740.2 |
| +4          | 16                   | 218332.7 | 739.8759 | 160549   |

Table S1e

|           |                      | G5 (tat/rev) |        |       |         |        |        |
|-----------|----------------------|--------------|--------|-------|---------|--------|--------|
| Treatment | Weeks Post Infection | J427         | J428   | J450  | J451    | J452   | J453   |
| -4        | 4                    | 121000       | 44000  | 70600 | 44000   | 121000 | 139000 |
| -3        | 5                    | 198000       | 926000 | 91300 | 3350000 | 291000 | 54500  |
| 1         | 8                    | 2210         | 0      | 2500  | 1130    | 4080   | 0      |
| 2         | 9                    | 9600         | 3920   | 2260  | 0       | 4200   | 0      |
| 3         | 10                   | 11000        | 6800   | 0     | 0       | 9600   | 0      |
| 4         | 11                   | 3610         | 2710   | 2530  | 0       | 9070   | 0      |
| 5         | 12                   | 13900        | 1160   | 1160  | 4160    | 3360   | 0      |
| +1        | 13                   | 880          | 1050   | 0     | 1970    | 3920   | 0      |
| +2        | 14                   | 5850         | 3920   | 1650  | 1050    | 1860   | 1650   |
| +3        | 15                   | 12400        | 8140   | 4990  | 4040    | 4040   | 33000  |
| +4        | 16                   | 4330         | 400    | 2730  | 10100   | 1720   | 16000  |

Table S1f

| G5 (cocktail) |                      |          |          |          |          |          |          |
|---------------|----------------------|----------|----------|----------|----------|----------|----------|
| Treatment     | Weeks Post Infection | J374     | J376     | J397     | J398     | J400     | J401     |
| -4            | 4                    | 41134.88 | 255228.4 | 23951.38 | 14921.45 | 7589.469 | 86530.59 |
| -3            | 5                    | 197558.6 | 224694.8 | 210690.3 | 162873.4 | 37070.89 | 210690.3 |
| 1             | 8                    | 7993.028 | 0        | 2210.536 | 3001.965 | 2079.294 | 0        |
| 2             | 9                    | 5924.157 | 0        | 2257.958 | 0        | 0        | 0        |
| 3             | 10                   | 7284.39  | 0        | 1836.323 | 0        | 2107.626 | 0        |
| 4             | 11                   | 0        | 0        | 4460.82  | 1433.839 | 1773.87  | 0        |
| 5             | 12                   | 7329.337 | 0        | 7329.337 | 12042.45 | 5924.385 | 0        |
| +1            | 13                   | 1106.96  | 0        | 4146.658 | 1172.384 | 12345.64 | 0        |
| +2            | 14                   | 2938.139 | 1315.059 | 1315.059 | 1475.097 | 1965.661 | 2335.187 |
| +3            | 15                   | 1147.557 | 930.2866 | 3515.19  | 4043.157 | 4987.448 | 6598.146 |
| +4            | 16                   | 343.0682 | 233.6099 | 739.8759 | 1173.345 | 3441.245 | 9346.037 |
