# Supplementary material
Source: PubMed Central journal article supplement (PMC3242666)
Supplement: mt2011207x9.pdf [file mt2011207x9.pdf]

**Table S2**

|                      | Uninfected Control |      | Non Treated |       |        |       | G5 (tat/rev) retreated with G5 (cocktail) |      |       |      |       | G5 (cocktail) |
|----------------------|--------------------|------|-------------|-------|--------|-------|-------------------------------------------|------|-------|------|-------|---------------|
| Weeks Post Infection | J410               | J411 | J378        | J379  | J380   | J381  | J427                                      | J450 | J451  | J452 | J453  | J400          |
| 16                   | 0                  | 0    | 8010        | 4680  | 109000 | 17300 | 4330                                      | 2730 | 10100 | 1720 | 16000 | 3441.245      |
| 22                   | 0                  | 0    | 3990        | 12300 | 764    | 1290  | 1750                                      | 2740 | 6270  | 764  | 2190  | 1110          |
| 25                   | 0                  | 0    | 3020        | 9120  | 597    | 1000  | 0                                         | 0    | 692   | 384  | 56.5  | 198           |
| 26                   | 0                  | 0    | 1820        | 63.6  | 690    | 930   | 0                                         | 0    | 92.3  | 0    | 304   | 0             |
| 27                   | 0                  | 0    | 98.9        | 429   | 1860   | 0     | 183                                       | 0    | 231   | 0    | 1260  | 0             |
| 28                   | 0                  | 0    | 187         | 163   | 2020   | 0     | 116                                       | 88.6 | 263   | 0    | 214   | 0             |
