# Supplementary material
Source: PubMed Central journal article supplement (PMC3242666)
Supplement: mt2011207x10.pdf [file mt2011207x10.pdf]

## Table S3

Table S3a

| Treatment | Weeks Post Infection | Uninfected Control |      |
|-----------|----------------------|--------------------|------|
|           |                      | J410               | J411 |
| -8        | 0                    | 72.7               | 69.5 |
| -4        | 4                    | 73.4               | 65.4 |
| -2        | 6                    | 59.9               | 60.2 |
| 1         | 8                    | 64.9               | 61.4 |
| 3         | 10                   | 75.4               | 57.6 |
| 5         | 12                   | 77.8               | 54.3 |
| +2        | 14                   | 71.7               | 55.1 |
| +4        | 16                   | 70.2               | 56.5 |
| +6        | 18                   | 59.9               | 54.1 |
| +10       | 22                   | 78.3               | 58.4 |

Table S3b

|           |                      | Non-treated |      |      |      |      |      |      |
|-----------|----------------------|-------------|------|------|------|------|------|------|
| Treatment | Weeks Post Infection | J377        | J378 | J379 | J380 | J381 | J389 | J390 |
| -8        | 0                    | 56.2        | 62.3 | 47.3 | 56.6 | 71.7 | 64.3 | 71.2 |
| -4        | 4                    | 54.9        | 67.6 | 50.1 | 59.6 | 63   | 43.9 | 67.8 |
| -2        | 6                    | 50.2        | 54.8 | 42.2 | 62.6 | 67   | 54.9 | 62.3 |
| 1         | 8                    | 46.6        | 67.2 | 44.5 | 55.7 | 54.8 | 52.8 | 67.7 |
| 3         | 10                   | 45.1        | 58.8 | 41.2 | 46.9 | 52.1 | 48.5 | 56.4 |
| 5         | 12                   | 35.7        | 55.2 | 44.3 | 37.5 | 15.5 | 47.3 | 51.2 |
| +2        | 14                   | 33.7        | 49.4 | 41.8 | 40.2 | 25.8 | 41.4 | 47.8 |
| +4        | 16                   | 30.3        | 57.8 | 38.4 | 40.1 | 22.3 | 40.9 | 43.1 |
| +6        | 18                   | 31.3        | 50.3 | 32.7 | 43.2 | 16.9 | 42.1 | 40   |
| +10       | 22                   | 28.6        | 43   | 35.9 | 25.2 | 12.4 |      |      |

Table S3c

G5 (mutant)

| Treatment | Weeks Post Infection | J461 | J462 | J465 |
|-----------|----------------------|------|------|------|
| -8        | 0                    | 78.1 | 63   | 82.1 |
| -4        | 4                    | 84.6 | 72.2 | 85.7 |
| -2        | 6                    | 72   | 74.8 | 84.4 |
| 1         | 8                    | 73   | 67.7 | 75.6 |
| 3         | 10                   | 55.8 | 54.6 | 70.9 |
| 5         | 12                   | 35.5 | 42.3 | 61.5 |
| +2        | 14                   | 42.5 | 33.1 | 58.6 |
| +4        | 16                   | 35.1 | 28.6 | 39.3 |
| +6        | 18                   | 39.9 | 22.5 | 40   |
| +10       | 22                   | 35.4 | 20.8 | 38.4 |

Table S3d

G5 (tat/rev)

| Treatment | Weeks Post Infection | J427 | J428 | J450 | J451 | J452 | J453 |
|-----------|----------------------|------|------|------|------|------|------|
| -8        | 0                    | 50.4 | 73.9 | 73   | 65.4 | 56.6 | 81.2 |
| -4        | 4                    | 48.6 |      | 81.4 | 67   | 55.3 | 73.7 |
| -2        | 6                    | 52.8 | 65.6 | 74.4 | 72.3 | 48.4 | 66.5 |
| 1         | 8                    | 44.2 | 68.5 | 68.7 | 73.6 | 50.5 | 71.7 |
| 3         | 10                   | 45.1 | 64.2 | 60.8 | 66.9 | 52.9 | 65.6 |
| 5         | 12                   | 37.7 | 72.5 | 57.4 | 61.2 | 45.3 | 32.4 |
| +2        | 14                   | 40.8 | 60.3 | 60.4 | 48.2 | 55.8 | 38.8 |
| +4        | 16                   | 43.1 | 57.2 | 52.4 | 54.6 | 48.3 | 40   |
| +6        | 18                   | 40.2 | 54.6 | 32.1 | 58.1 | 40.7 | 35.6 |
| +10       | 22                   |      | 57.1 | 25.3 | 56   | 52.7 | 41.7 |

Table S3e

G5 (cocktail)

| Treatment | Weeks Post Infection | J374 | J376 | J397 | J398 | J400 | J401 |
|-----------|----------------------|------|------|------|------|------|------|
| -8        | 0                    | 68.5 | 67.4 | 42.9 | 36.7 | 72.3 | 64.6 |
| -4        | 4                    | 70.4 | 36.4 | 48.6 | 50   | 54.6 | 57.1 |
| -2        | 6                    | 59.6 | 51.9 | 49.5 | 37.3 | 52.8 | 50.6 |
| 1         | 8                    | 53.7 | 48.3 | 33.4 | 45.2 | 58.5 | 48.1 |
| 3         | 10                   | 40.2 | 51.9 | 40   | 46.8 | 61   | 59.6 |
| 5         | 12                   | 45   | 45.1 | 35.3 | 56.7 | 56.3 | 53.4 |
| +2        | 14                   | 48.7 | 42.3 | 38.9 | 50.1 | 52.4 | 51.6 |
| +4        | 16                   | 61.3 | 55.4 | 52.5 | 55.3 | 58.5 | 64.6 |
| +6        | 18                   | 53.2 | 46.9 | 59.2 | 51   | 59.3 | 59.1 |
| +10       | 22                   | 50   | 46.3 |      |      | 68.9 | 51.4 |
