# Supplementary material
Source: PubMed Central journal article supplement (PMC3242666)
Supplement: mt2011207x11.pdf [file mt2011207x11.pdf]

**Table S4**

| Treatment | Weeks Post Infection | Uninfected Control |      | Non-treated |          |          |         | G5 (alone) |       |        |       |
|-----------|----------------------|--------------------|------|-------------|----------|----------|---------|------------|-------|--------|-------|
|           |                      | J476               | J477 | J472        | J473     | J474     | J475    | J487       | J488  | J489   | J491  |
| -2        | 11                   | 0                  | 0    | 176990.3    | 45161.05 | 5900.32  | 2548.12 | 4300       | 16600 | 32700  | 74800 |
| -1        | 12                   | 0                  | 0    | 100391.6    | 55485.89 | 16644.8  | 26127.7 | 27000      | 7240  | 38800  | 69600 |
| 1         | 13                   | 0                  | 0    | 13930.98    | 60574.84 | 101580   | 2882.55 | 14000      | 4340  | 259000 | 13000 |
| 2         | 14                   | 0                  | 0    | 82307.52    | 21881.66 | 106319   | 1973.21 | 2610       | 20100 | 155000 | 13000 |
| 3         | 15                   | 0                  | 0    | 23278.85    | 163000.2 | 11098.36 | 1711.17 | 23800      | 5860  | 17700  | 3500  |
| 4         | 16                   | 0                  | 0    | 4746.37     | 103900.2 | 233057.2 | 491733  | 53500      | 6790  | 2420   | 15300 |
| 5         | 17                   | 0                  | 0    | 1680.99     | 5940.88  | 56234.1  | 137686  | 53500      | 37000 | 22100  | 308   |
| +1        | 18                   | 0                  | 0    | 1895.74     | 1376.86  | 1523.25  | 24484.4 | 127        | 745   | 229    | 2420  |
| +2        | 19                   | 0                  | 0    | 985.35      | 901.212  | 9891.9   | 5663.15 | 5220       | 2650  | 1540   | 8990  |
| +3        | 20                   | 0                  | 0    | 804.25      | 742.5    | 6085.5   | 7073.3  | 6400       | 281   | 2020   | 6400  |
| +4        | 21                   | 0                  | 0    | dead        | 285.52   | 1485.2   | 4023.27 | 2120       | 1510  | 390    | 991   |
| +5        | 22                   | 0                  | 0    |             | 0        | 785.2    | 699.87  | 4550       | 462   | 11600  | 5870  |
| +6        | 23                   | 0                  | 0    |             | 0        | 400.1    | 1120.45 | 682        | 68    | 1530   | 223   |
