# Supplementary material
Source: PubMed Central journal article supplement (PMC3242666)
Supplement: mt2011207x12.pdf [file mt2011207x12.pdf]

**Table S5**

| Weeks Post Infection | Uninfected Control |      | Non-treated |      |      |      | G5 (alone) |      |      |      |
|----------------------|--------------------|------|-------------|------|------|------|------------|------|------|------|
|                      | J476               | J477 | J472        | J473 | J474 | J475 | J487       | J488 | J489 | J491 |
| 0                    | 65                 | 77.4 | 70.6        | 72.8 | 70.4 | 65   | 66         | 75.2 | 78.2 | 70.6 |
| 2                    | 66.6               | 74.7 | 72.4        | 68.7 | 76.9 | 62.5 | 63.5       | 74   | 75.4 | 72.4 |
| 4                    | 67.7               | 66.7 | 80.1        | 69   | 77.7 | 63   | 65.5       | 64.1 | 69   | 80.1 |
| 6                    | 66.2               | 79.5 | 78.7        | 73.5 | 76.5 | 65.4 | 71.2       | 68.2 | 73.5 | 78.7 |
| 8                    | 63.7               | 68.7 | 77.4        | 80.6 | 50   | 51.7 | 50.5       | 61.1 | 76.8 | 77.4 |
| 10                   | 64.4               | 64.7 | 68.2        | 75.6 | 42.3 | 56.8 | 48.6       | 67.2 | 74.5 | 68.2 |
| 12                   | 64.7               | 66.7 | 65          | 76.8 | 40   | 54.2 | 54.2       | 71.6 | 76.8 | 65   |
| 14                   | 65.9               | 71.3 | 56.3        | 72.5 | 68.2 | 51.7 | 51.7       | 61.9 | 72.5 | 56.3 |
| 16                   | 62.7               | 76.8 | 60.2        | 61.8 | 31.7 | 55.1 | 45.1       | 60.2 | 65.4 | 60.2 |
| 18                   | 65                 | 63.9 | 55.9        | 58   | 28.6 | 38.5 | 38.5       | 50.2 | 68.4 | 55.9 |
| 19                   | 60.4               | 67.9 | 57.4        | 54.6 | 25.4 | 44.4 | 40.8       | 51.8 | 64.2 | 58.2 |
| 21                   | 62.1               | 62.4 | 52.4        | 48.3 | 28.9 | 38.6 | 35.9       | 48.2 | 58   | 56.6 |
| 23                   | 60                 | 68.4 | 48.6        | 47.4 | 30.4 | 24.2 | 39.4       | 51.9 | 60.2 | 55.1 |
