# Supplementary material
Source: PubMed Central journal article supplement (PMC3242666)
Supplement: mt2011207x13.pdf [file mt2011207x13.pdf]

**Table S6**

| Animal # | Sex | Parameter |        |        |       |                    | Notes                                 | Treatment                      |
|----------|-----|-----------|--------|--------|-------|--------------------|---------------------------------------|--------------------------------|
|          |     | Liver     | Kidney | Spleen | Lungs | Total Lesion Score |                                       |                                |
| J990     |     | 0         | 3      | 0      | 0     | 3                  | Tubular degeneration and regeneration | Poly I. C.                     |
| J987     |     | 0         | 0      | 0      | 0     | 0                  | No significant histologic lesions     | NT                             |
| J991     |     | 0         | 0      | 0      | 0     | 0                  | No significant histologic lesions     | NT                             |
| J986     |     | 0         | 0      | 2      | 0     | 2                  | Focal lymphoid hyperplasia            | G <sub>5</sub> -Cocktial siRNA |
| J983     |     | 2         | 0      | 0      | 0     | 2                  | Focal area of mineralization          | G <sub>5</sub> -Cocktial siRNA |
| J984     |     | 1         | 0      | 0      | 0     | 1                  | Minimal area of mineralization        | G <sub>5</sub> -Cocktial siRNA |
