# Supplementary material
Source: PubMed Central journal article supplement (PMC3242666)

# Figure S1

Figure S1 a

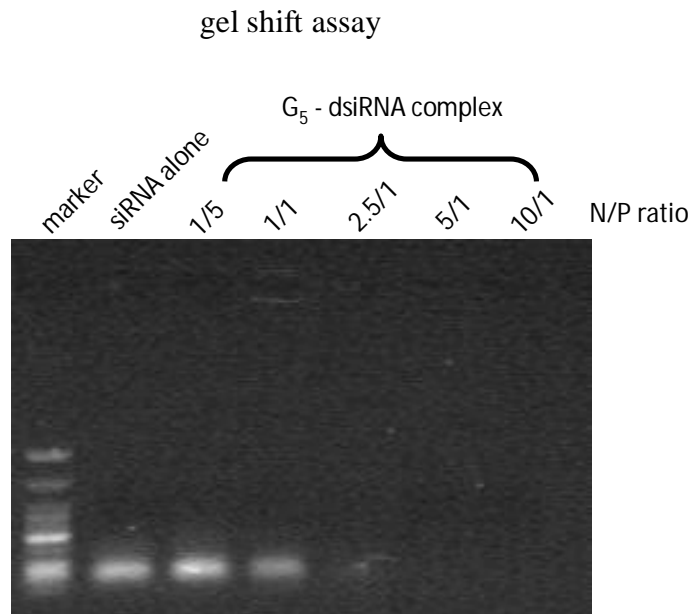

Figure S1 b

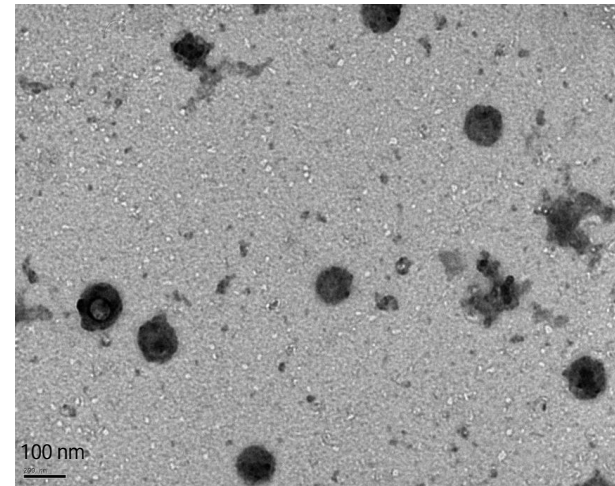

Figure S1 c

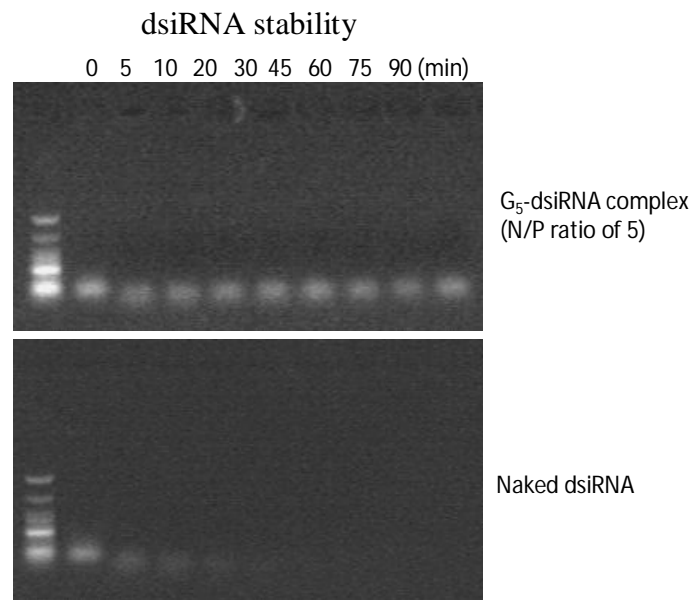

Figure S1 d

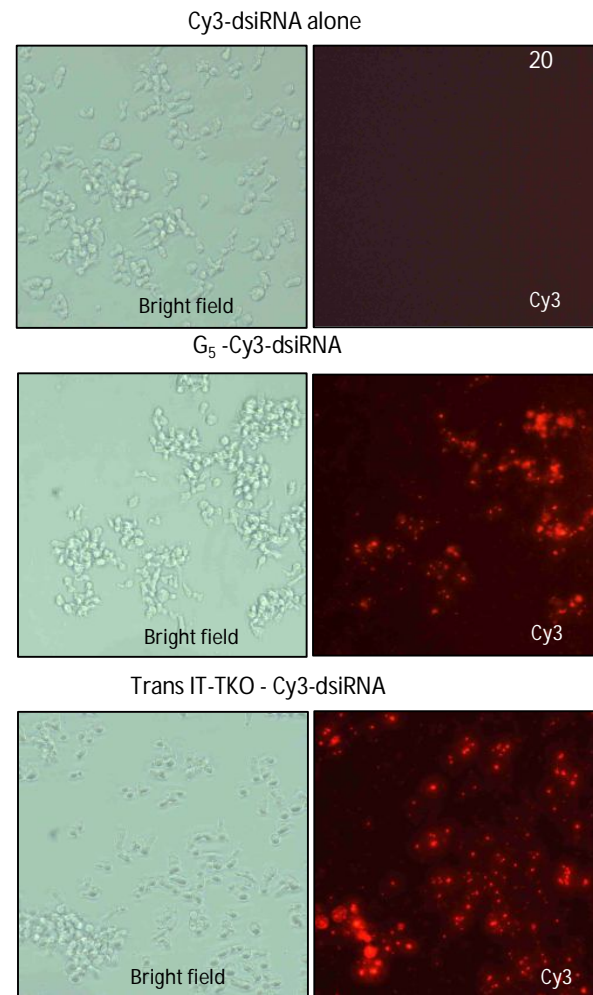

Supplement: mt2011207x1.pdf [file mt2011207x1.pdf]

# Figure S4

Figure S4 a

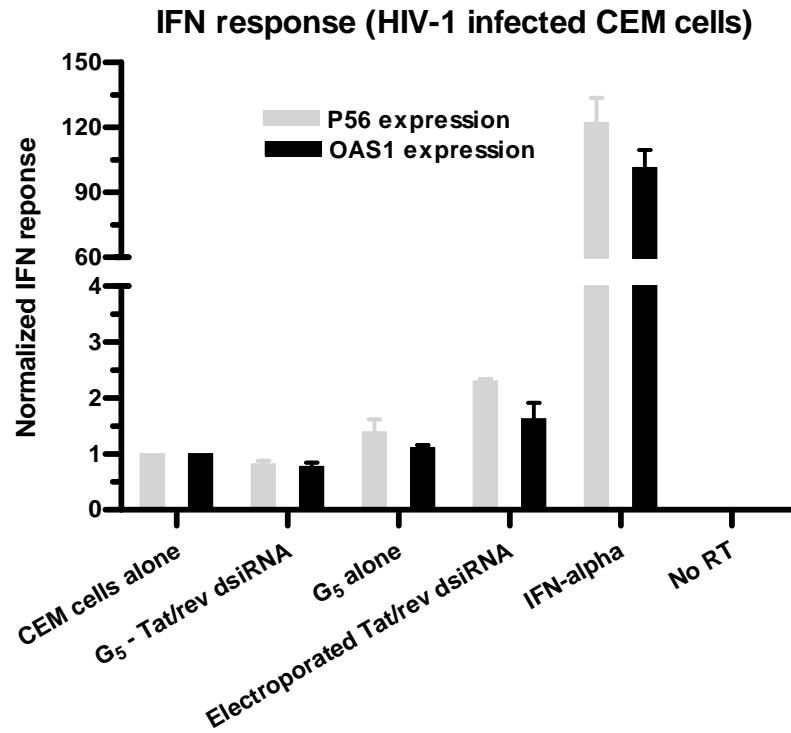

Figure S4 b

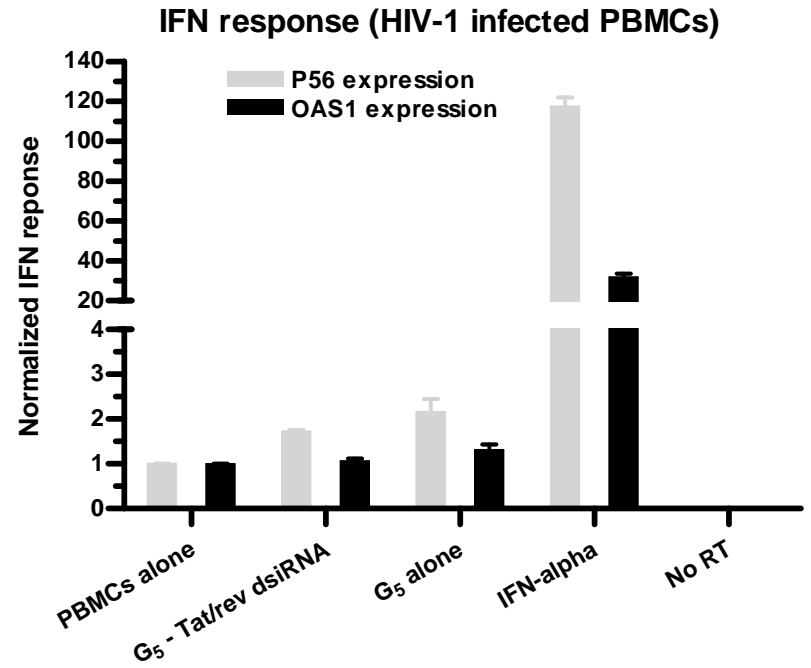

Figure S4 c

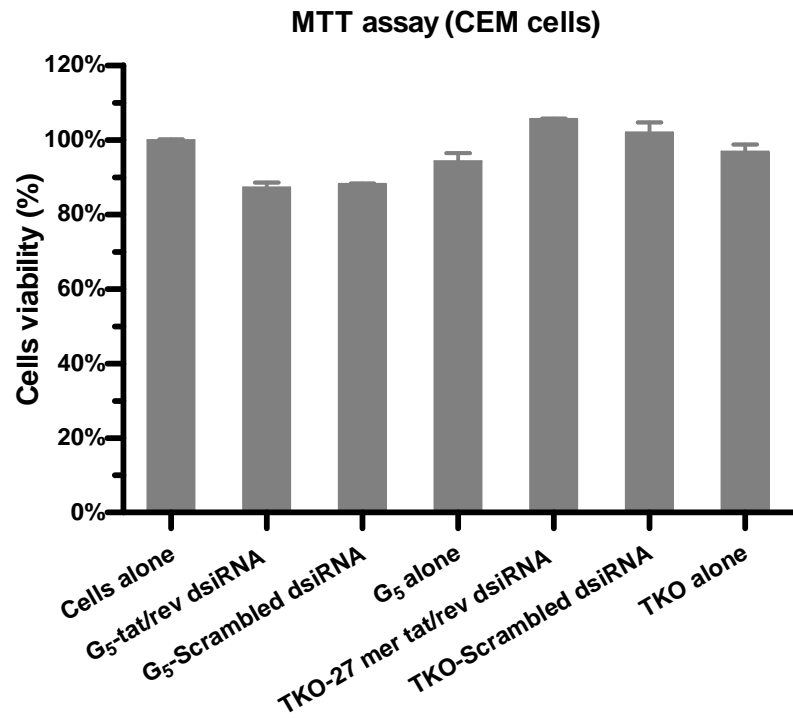

Figure S4 d

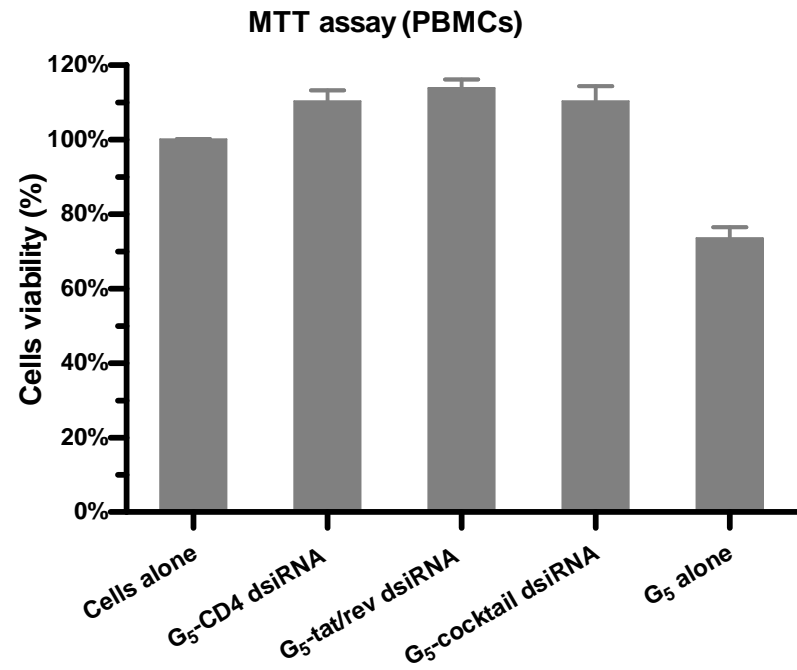

Supplement: mt2011207x4.pdf [file mt2011207x4.pdf]

Figure S5

Figure S5 a

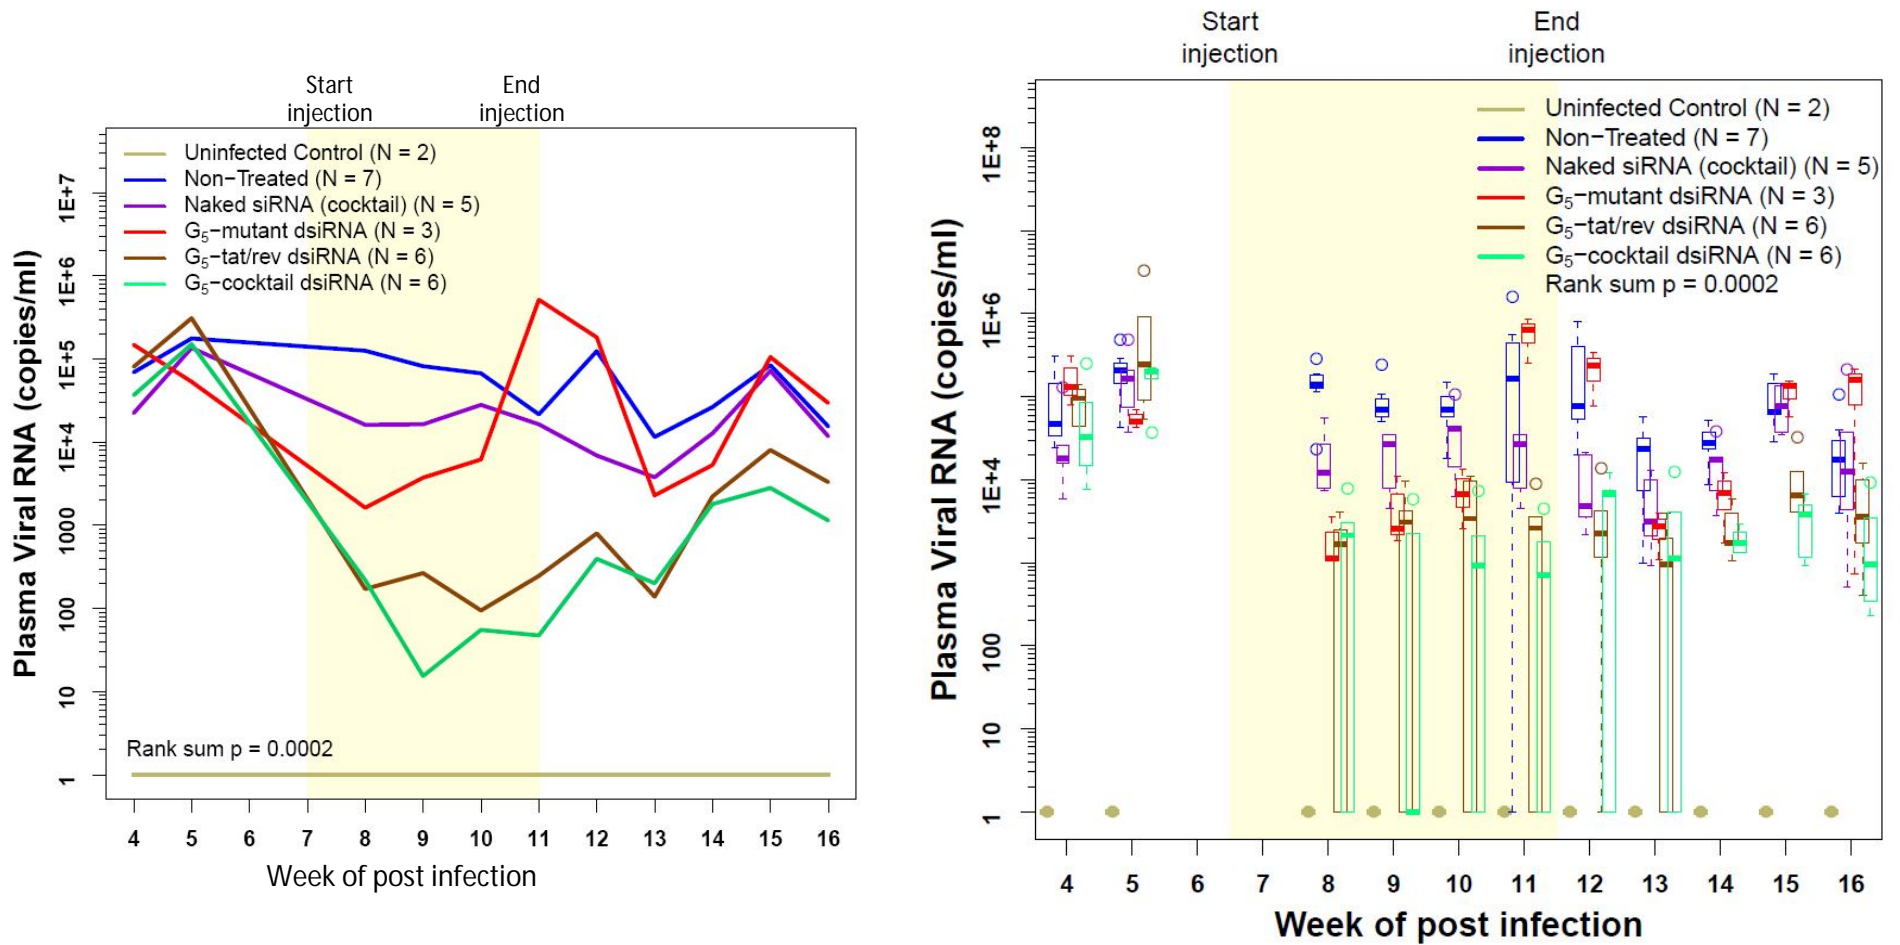

Figure S5 b

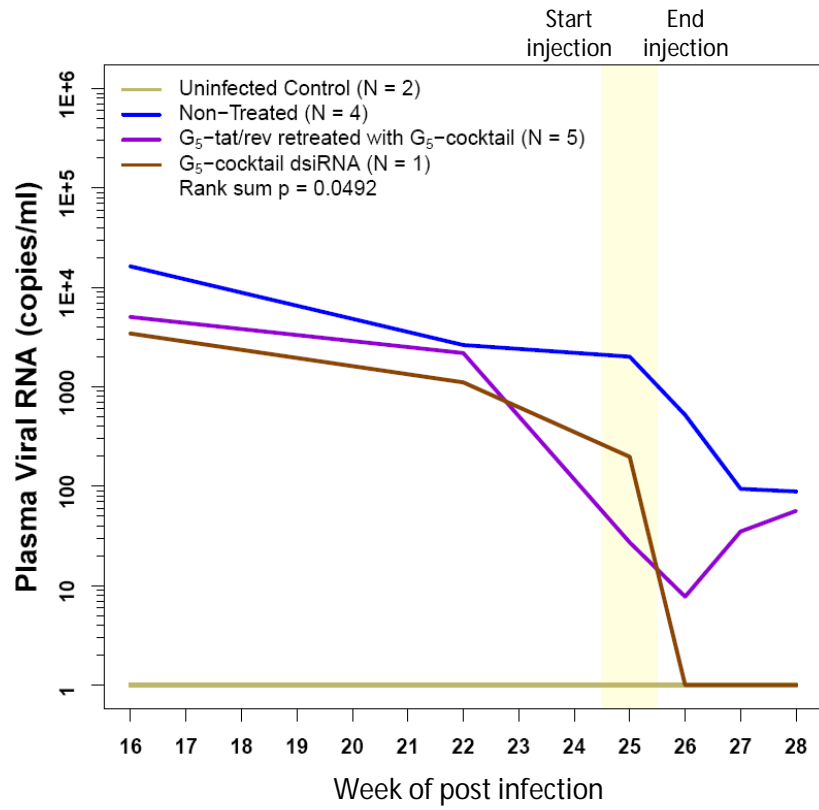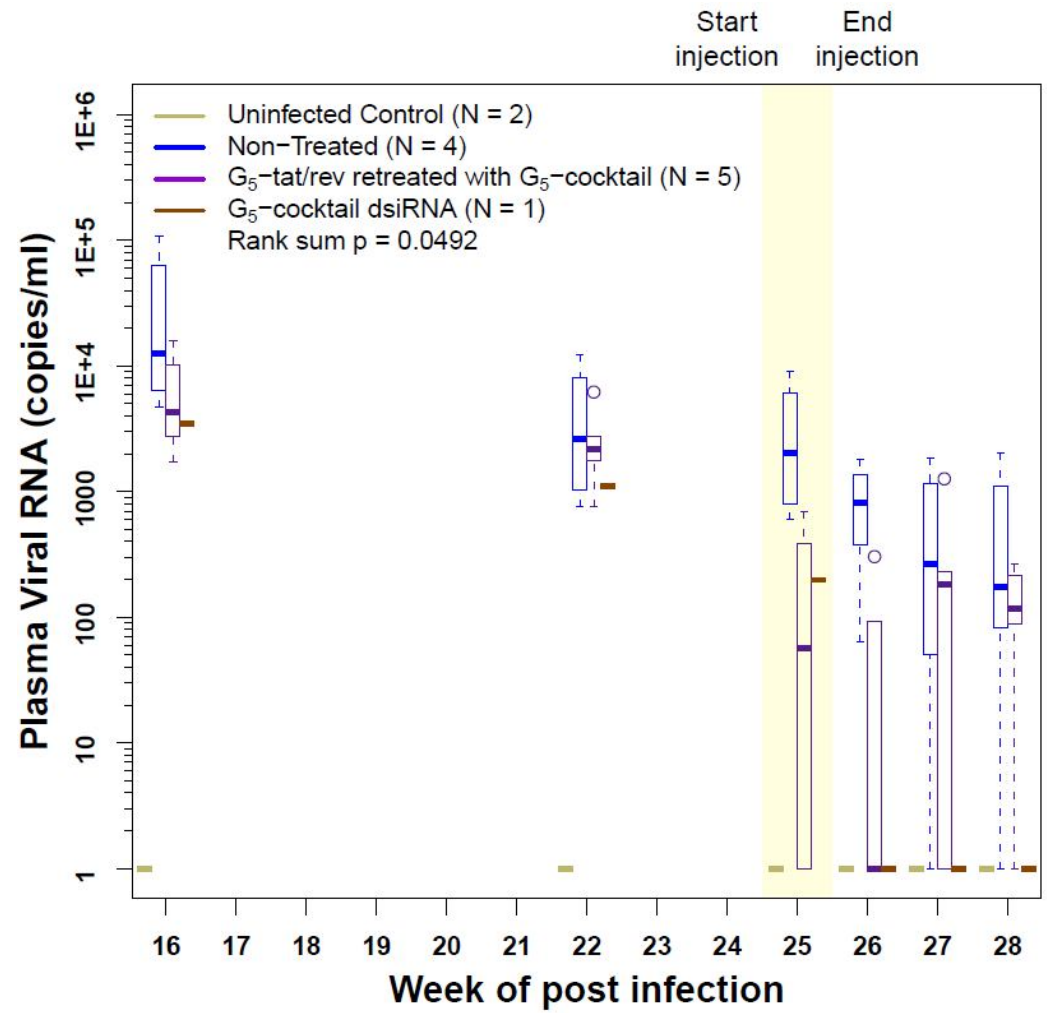

Figure S5c

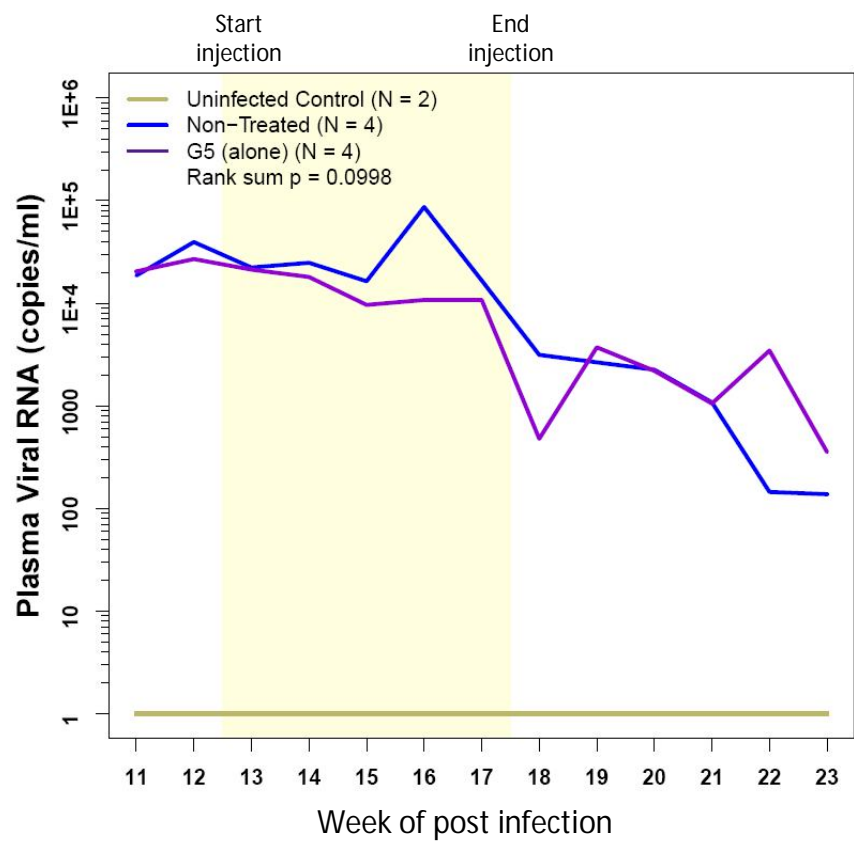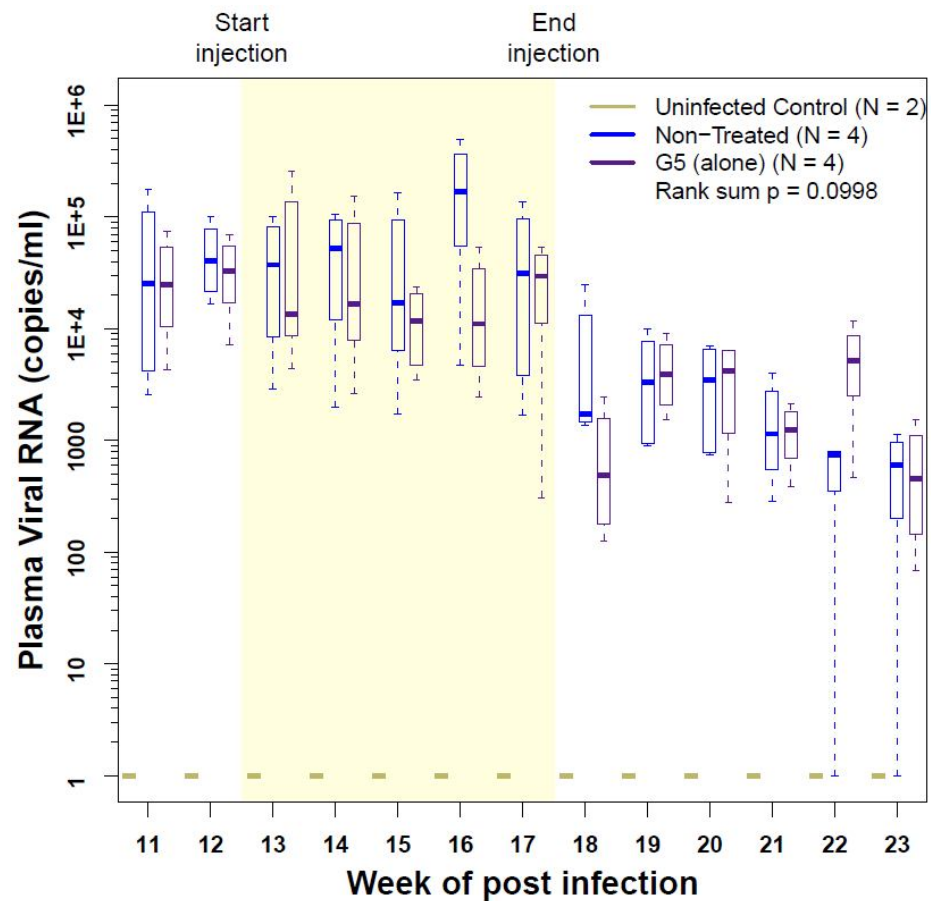

Supplement: mt2011207x5.pdf [file mt2011207x5.pdf]

# Figure S6

Figure S6a

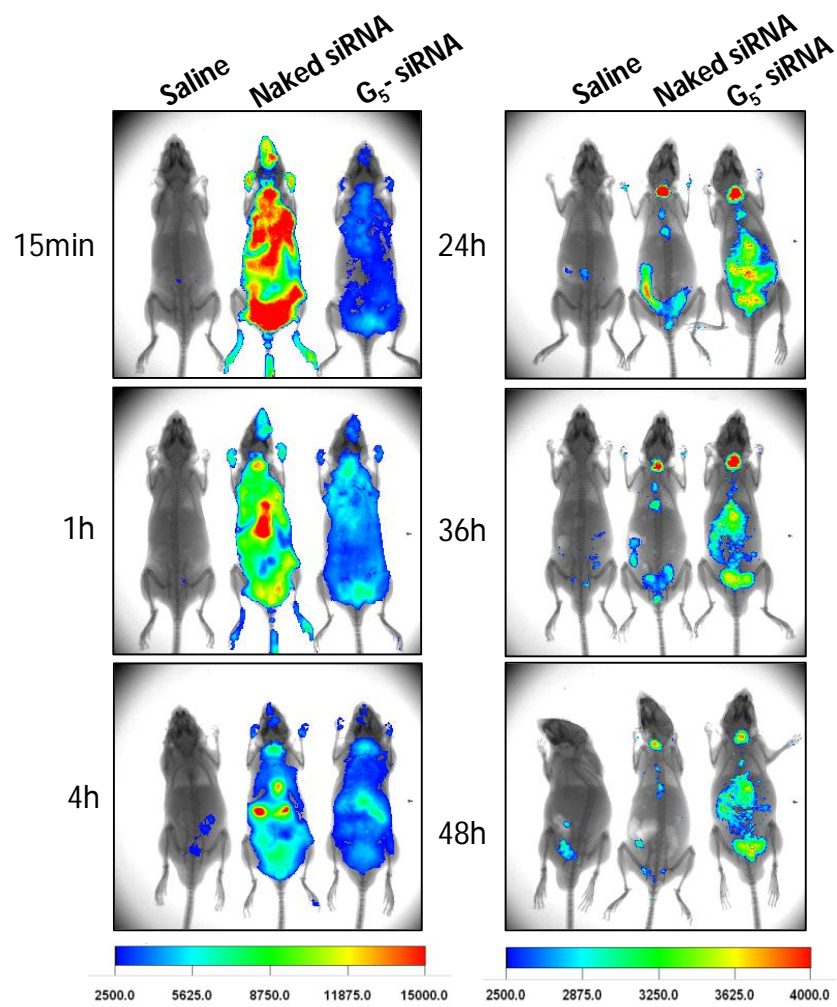

Figure S6b

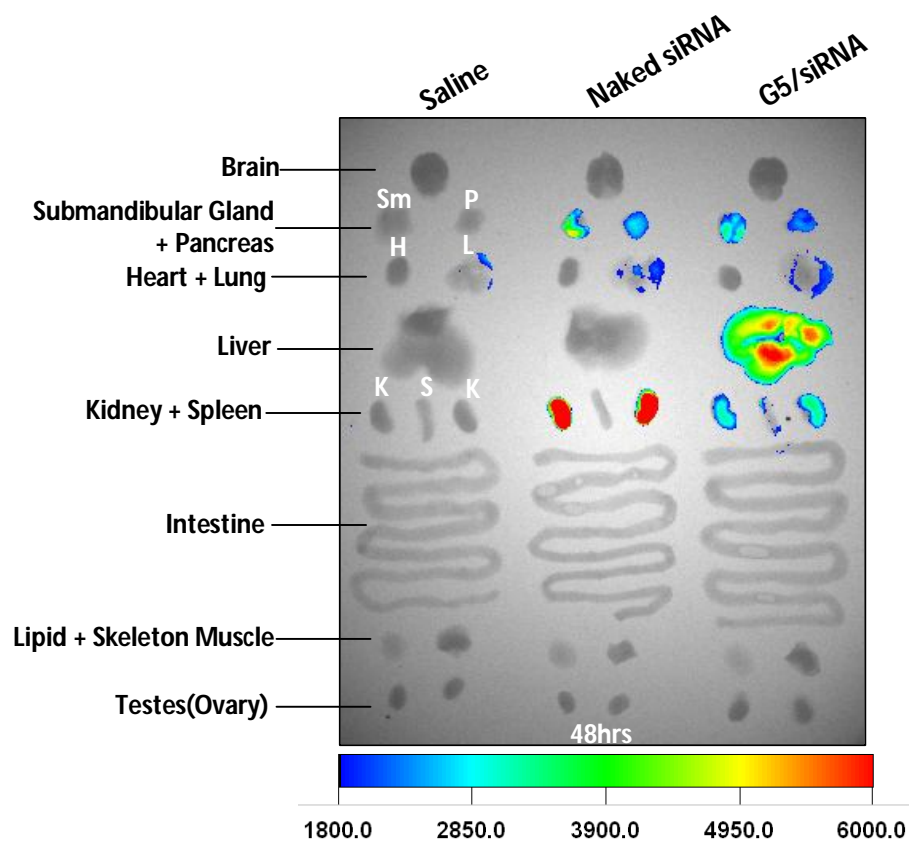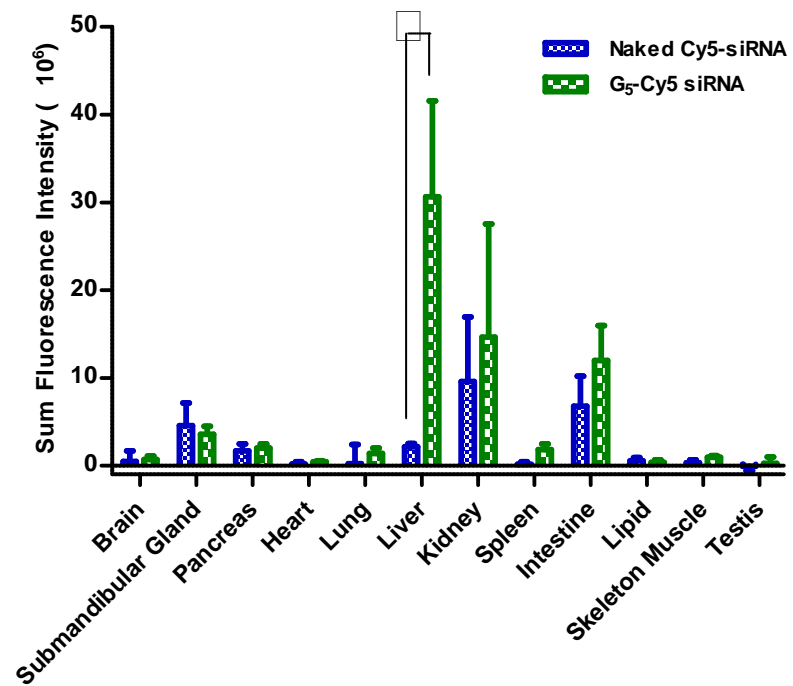

**Liver**

Figure S6c

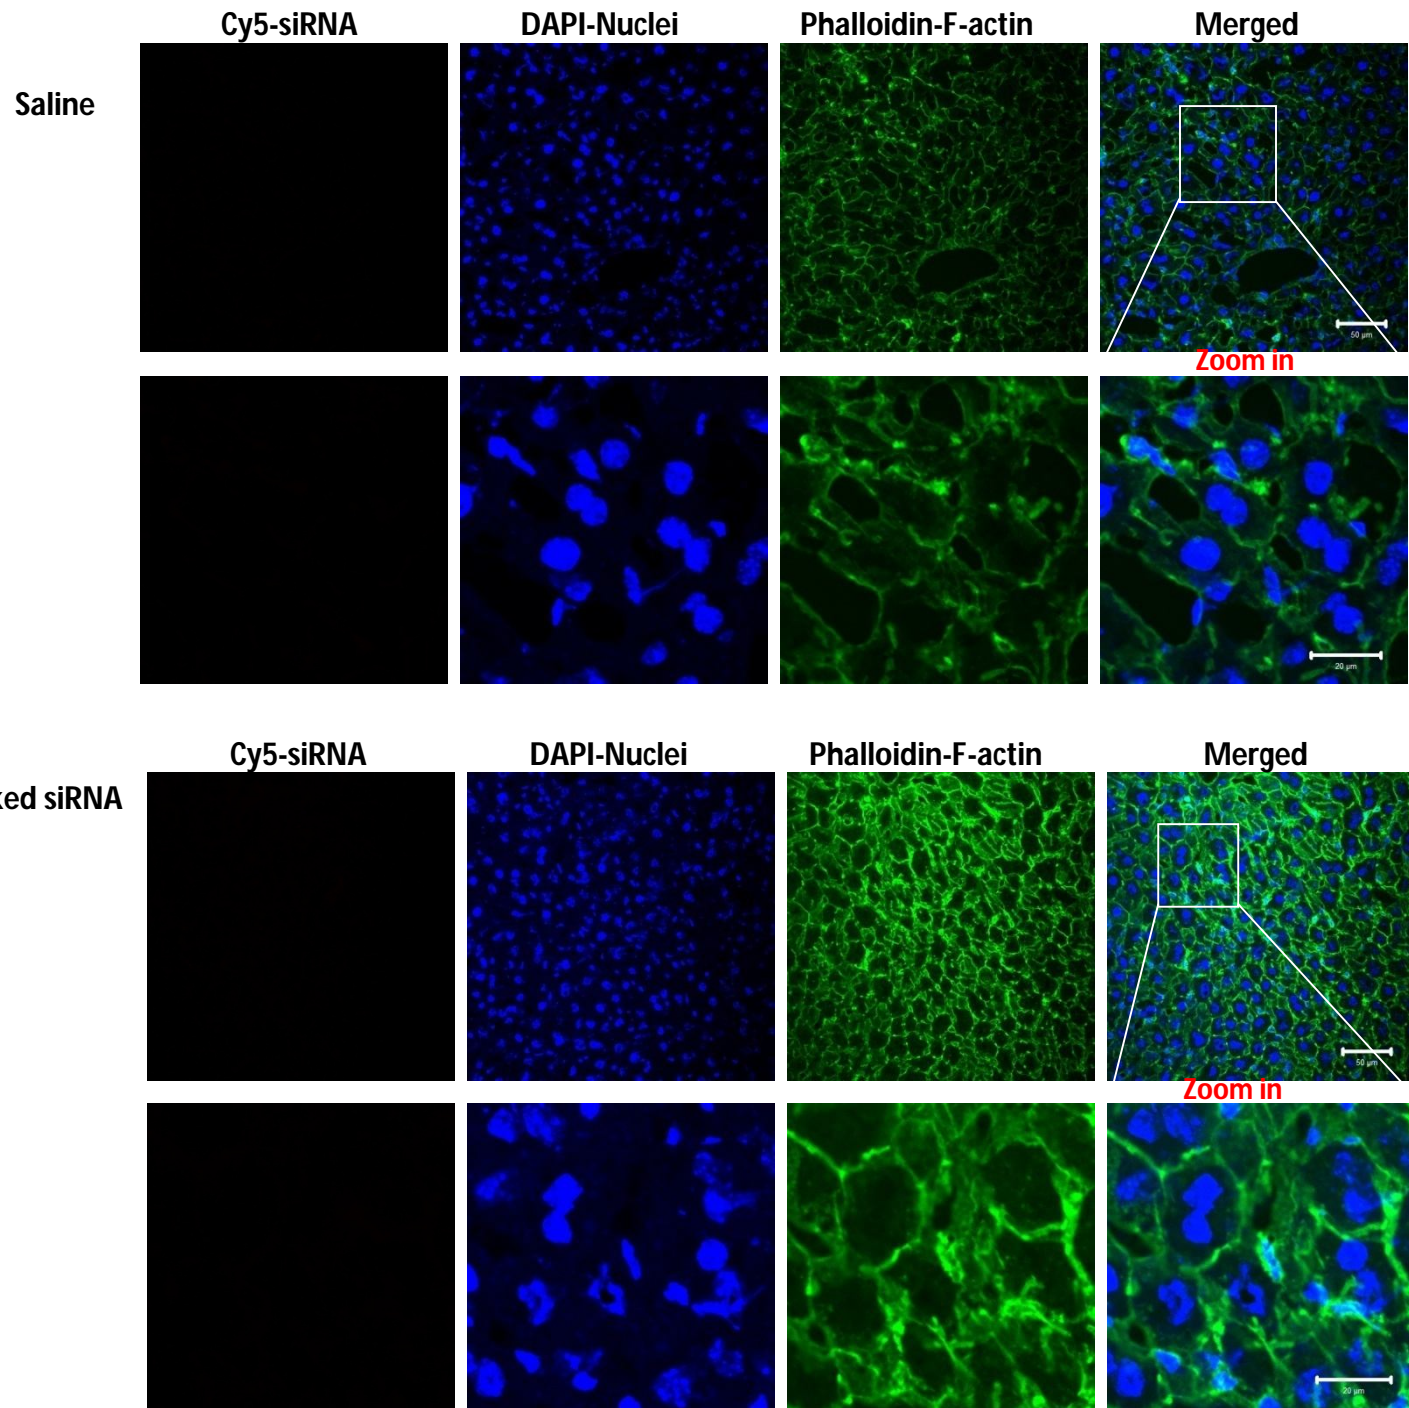

Figure S6d

G<sub>5</sub>-siNRA

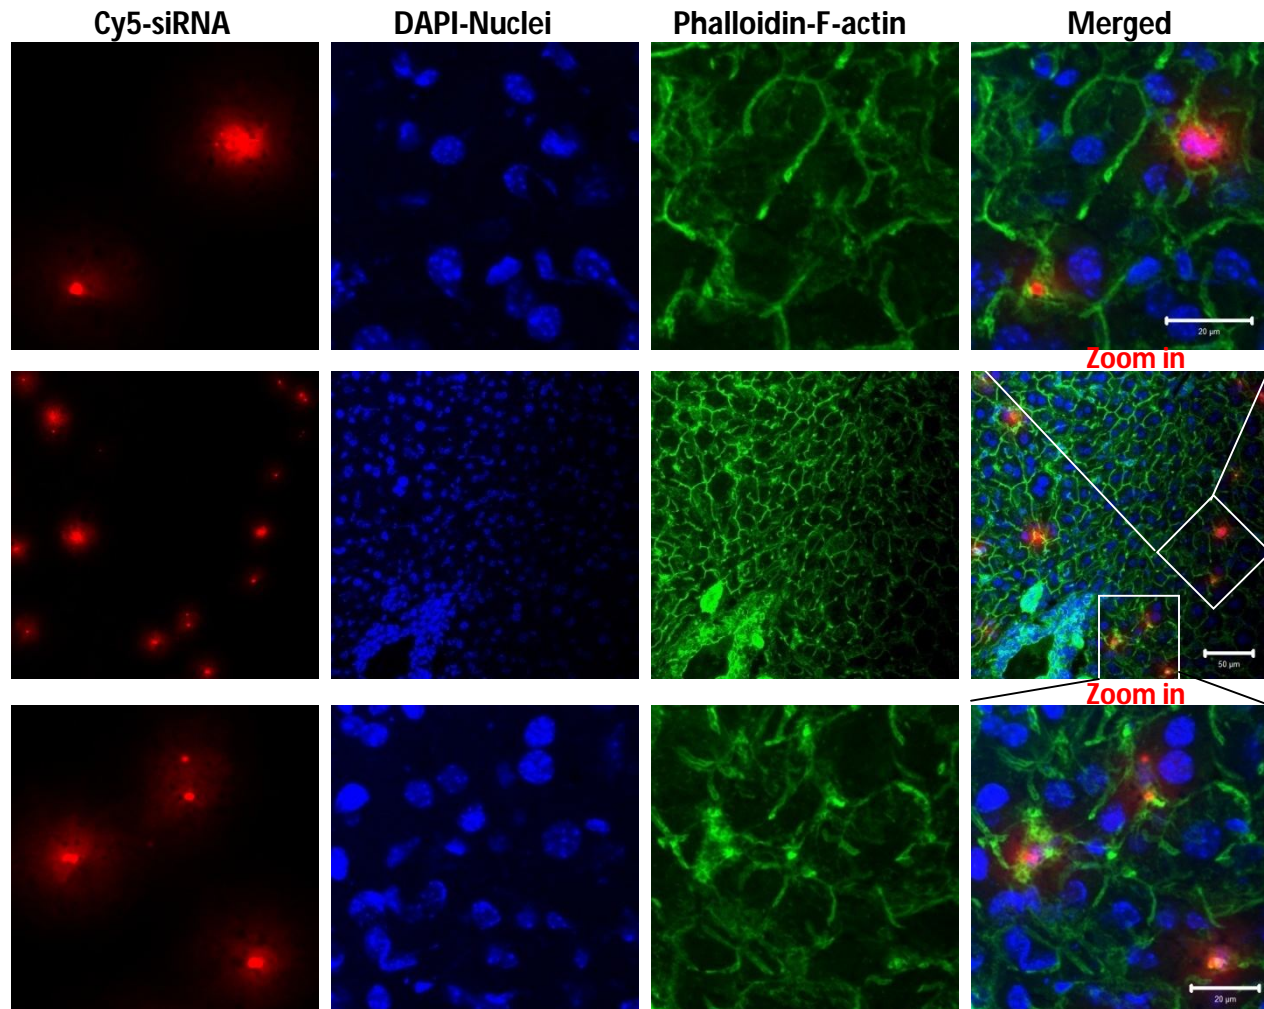

Supplement: mt2011207x6.pdf [file mt2011207x6.pdf]

Figure S7

Figure S7 a

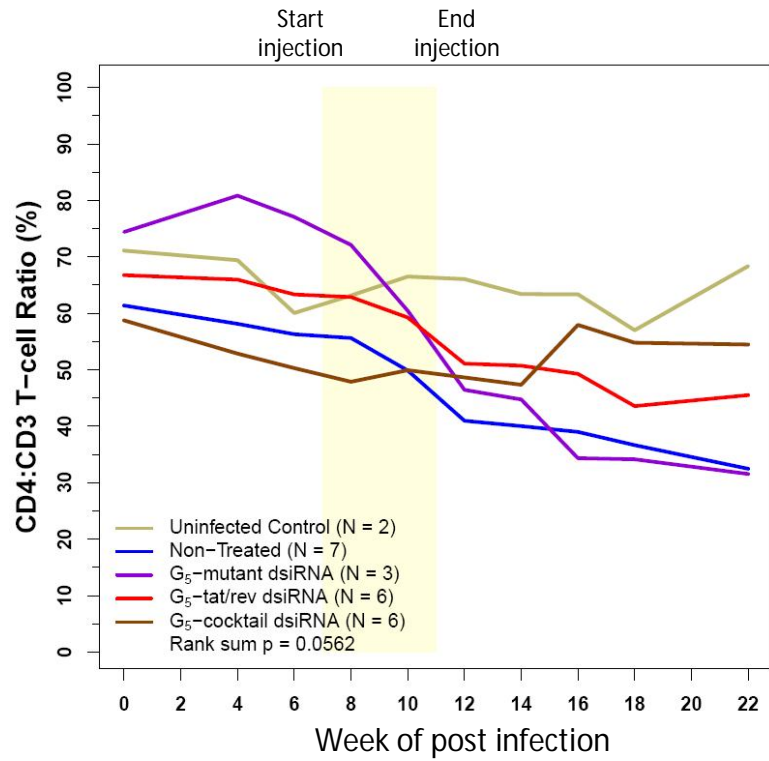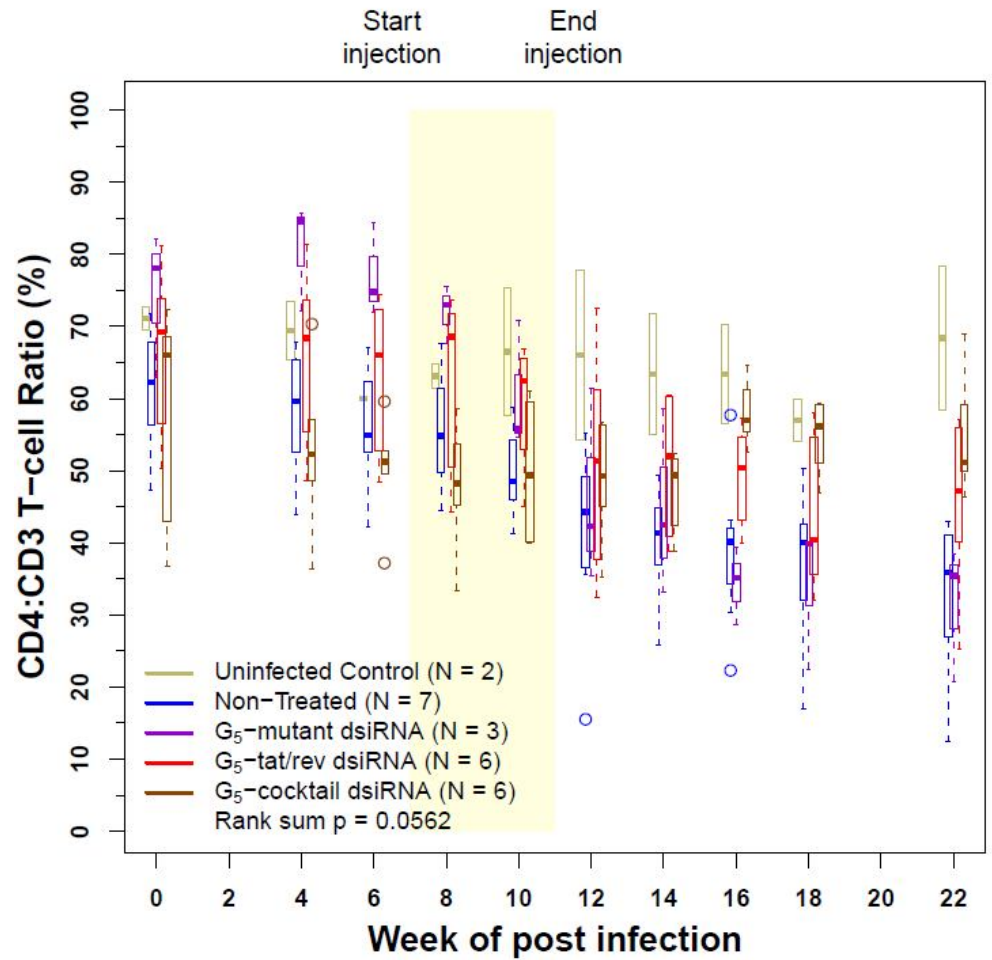

Figure S7 b

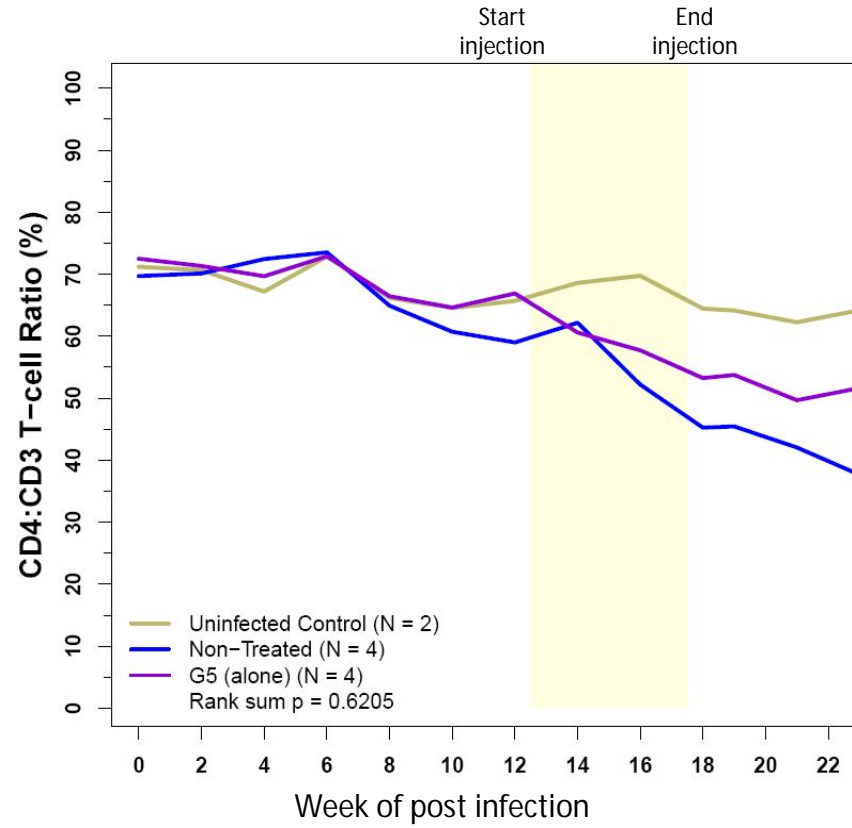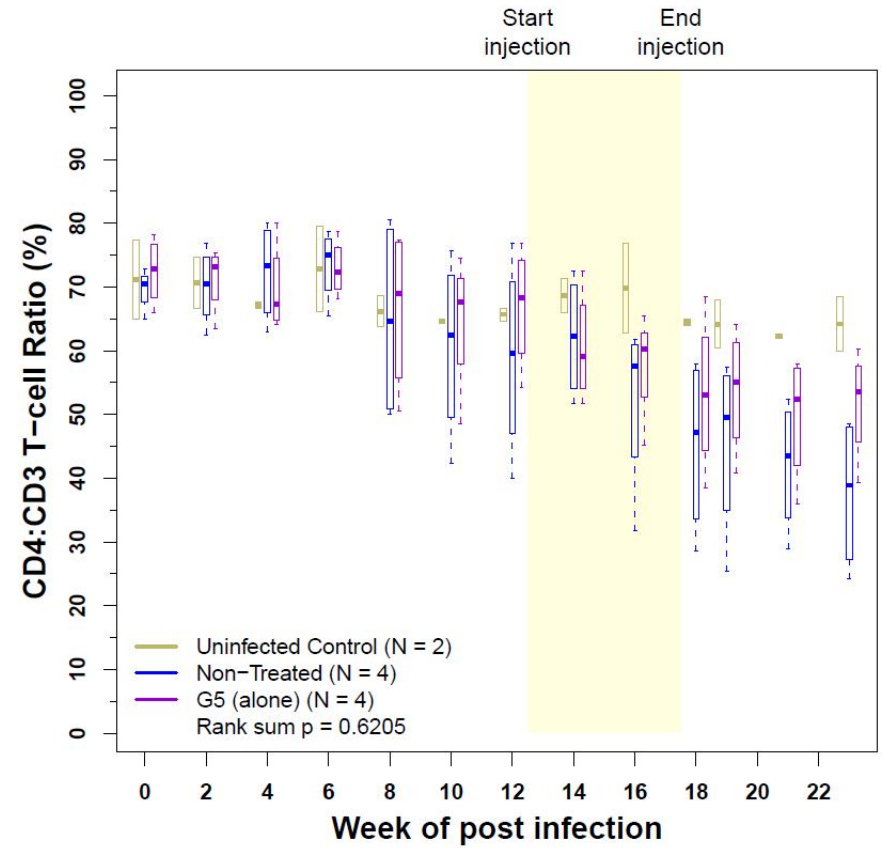

Supplement: mt2011207x7.pdf [file mt2011207x7.pdf]
